# Supplementary material for: Effect of Lentinan on Lipid Oxidation and Quality Change in Goose Meatballs during Cold Storage
Source: MDPI journal article supplement (doi:10.3390/foods11071055), 2022-04-06
Supplement: s1 [file s1]

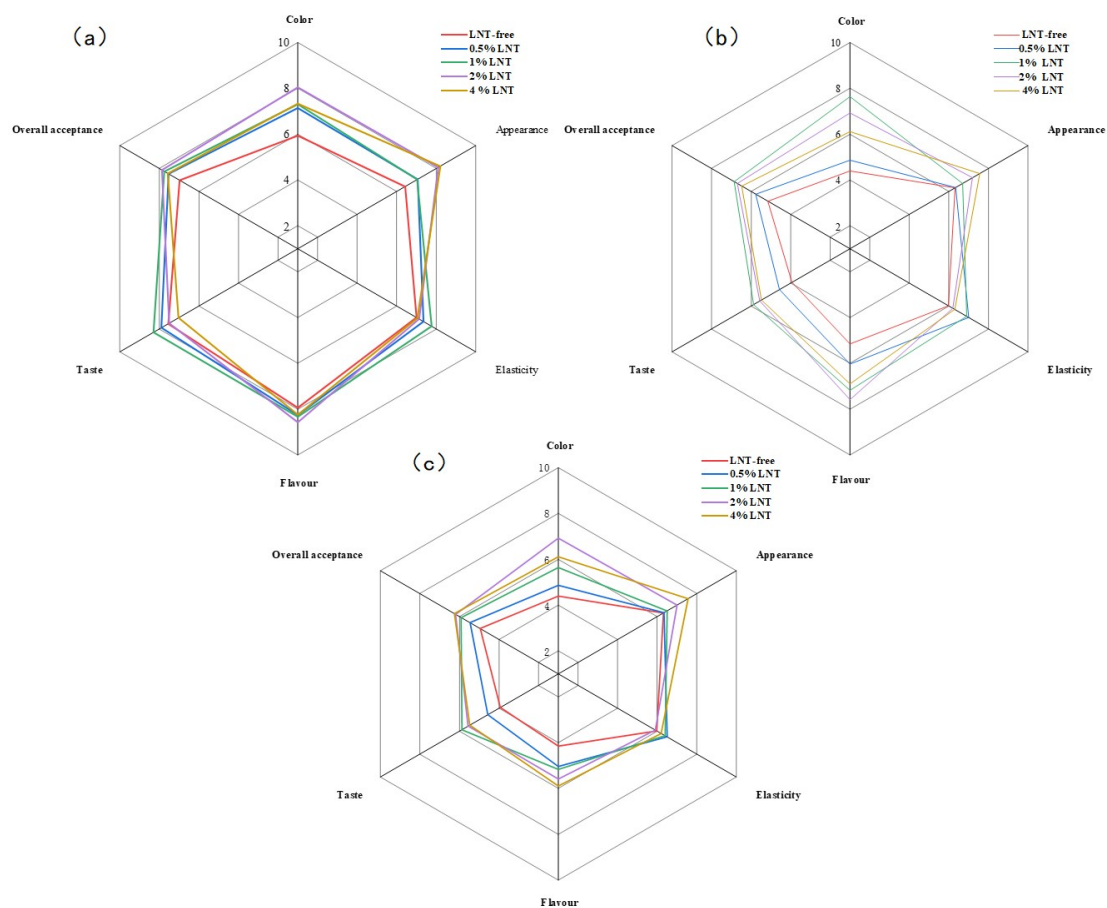

**Figure S1.** Effect of LNT on the sensory attributes of the goose meatball.

**Table S1.** P value of two-way ANOVA.

|       | LNT content | Storage time | LNT content×Storage time |
|-------|-------------|--------------|--------------------------|
| pH    | < 0.001     | < 0.001      | 0.001                    |
| L*    | < 0.001     | < 0.001      | 0.651                    |
| a*    | < 0.001     | < 0.001      | 0.533                    |
| b*    | < 0.001     | < 0.001      | < 0.001                  |
| TBARS | < 0.001     | < 0.001      | < 0.001                  |
| TVB-N | < 0.001     | < 0.001      | 0.001                    |
| Df    | < 0.001     | < 0.001      | 0.117                    |

---

|                     |         |         |         |
|---------------------|---------|---------|---------|
| Hardness(N)         | < 0.001 | < 0.001 | 0.003   |
| Springiness(mm)     | 0.001   | < 0.001 | 0.146   |
| Cohesiveness(ratio) | 0.001   | < 0.001 | 0.243   |
| Chewiness(N*mm)     | < 0.001 | < 0.001 | < 0.001 |

---
